# Supplementary material for: Fabrication of highly stable platinum organosols over DNA-scaffolds for enriched catalytic and SERS applications
Source: Royal Society of Chemistry journal article supplement (doi:10.1039/d1dt00653c), 2021-01-01
Supplement: d1dt00653c1.pdf [file d1dt00653c1.pdf]

## **Online Supporting Information**

### **Fabricating Highly Stable Platinum Organosol over DNA-Scaffolds for Enriched Catalytic and SERS applications**

**Ragunath Madhu<sup>†‡</sup>, Arun Karmakar<sup>†‡</sup>, Kannimuthu Karthick<sup>†‡</sup>, Sangeetha Kumaravel<sup>†‡</sup>, Selvasundarasekar Sam Sankar<sup>†‡</sup>, Devendra Prajapati<sup>§</sup> and Subrata Kundu<sup>†‡\*</sup>**

*<sup>†</sup>Electrochemical Process Engineering (EPE), CSIR-Central Electrochemical Research Institute (CECRI), Karaikudi-630003, Tamil Nadu, India.*

*<sup>‡</sup>Academy of Scientific and Innovative Research (AcSIR), Ghaziabad-201002, India.*

*<sup>§</sup>Central Instrumentation Facility (CIF), CSIR-Central Electrochemical Research Institute (CECRI), Karaikudi-630003, Tamil Nadu, India.*

*\*To whom correspondence should be addressed, E-mail: [skundu@cecri.res.in](mailto:skundu@cecri.res.in) and [kundu.subrata@gmail.com](mailto:kundu.subrata@gmail.com), Tel: +91 4565-241487.*

This SI file contains pages from S1 to S17, which contains the Fig. of XRD pattern, EDS analysis, the time-dependent UV-Vis absorption study, the corresponding kinetics analysis plot, SERS spectrum by using Pt@DNA (0.06 M) and comparison tables related to catalysis and SERS study.

**Number of Pages in SI: 17**

**Number of Figures in SI: 08**

**Number of Tables in SI: 07**

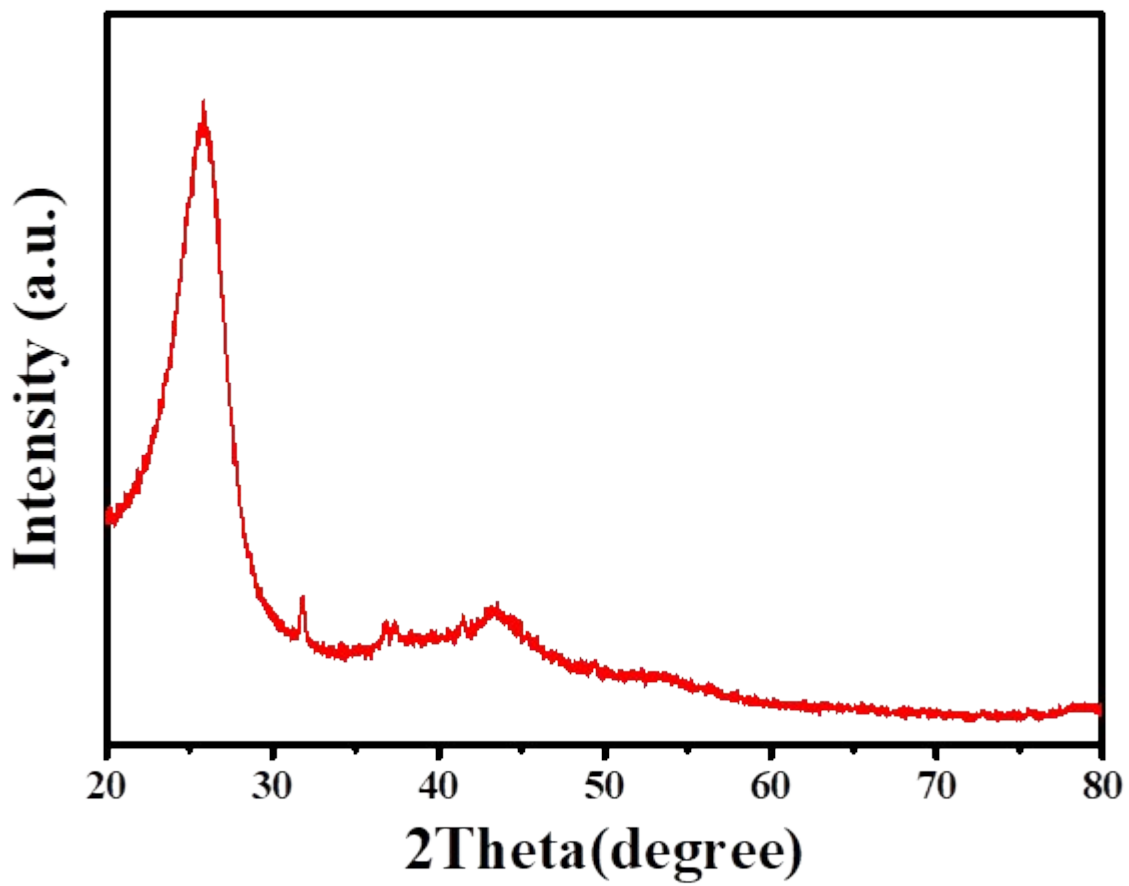

**Figure S1:** X-ray diffraction pattern of the Pt@DNA (0.06 M) organosol.

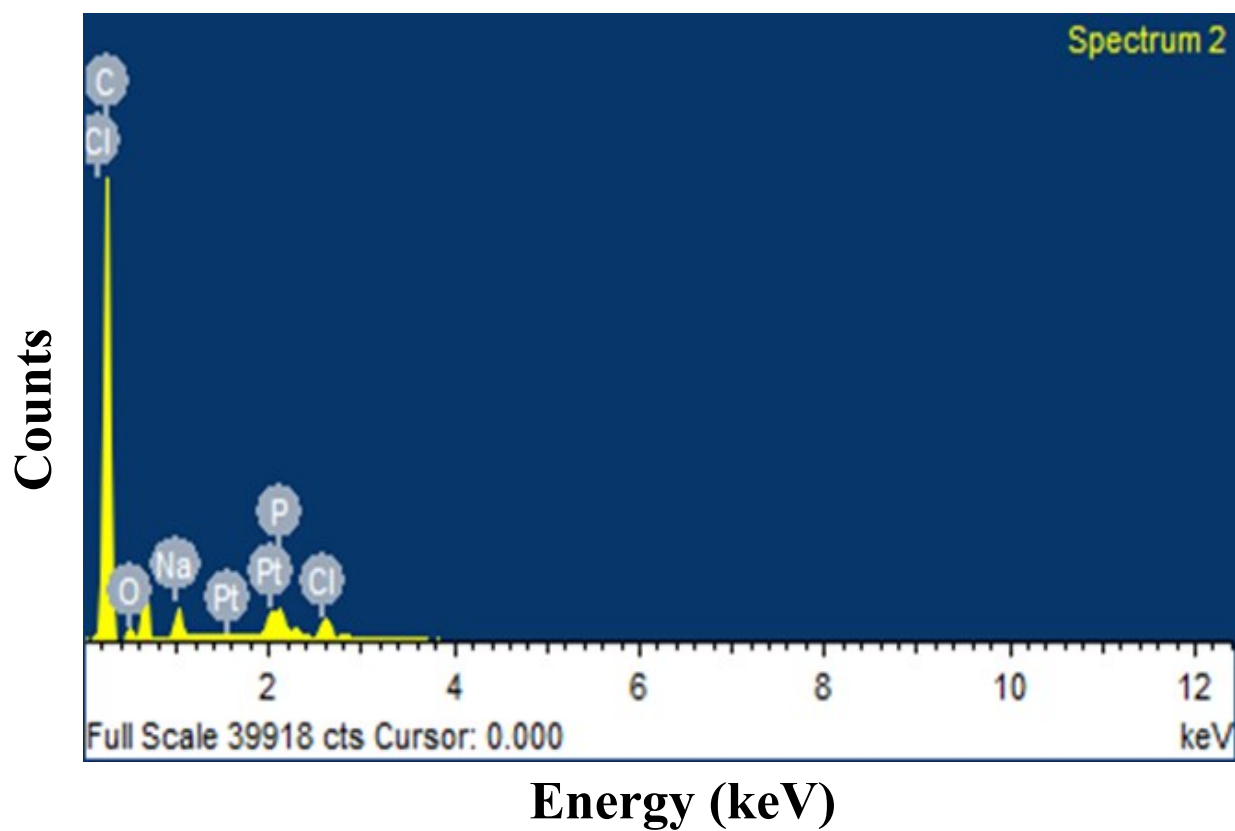

**Figure S2:** Energy dispersive X-ray spectrum (EDS) of Pt@DNA organosol in FE-SEM mode.

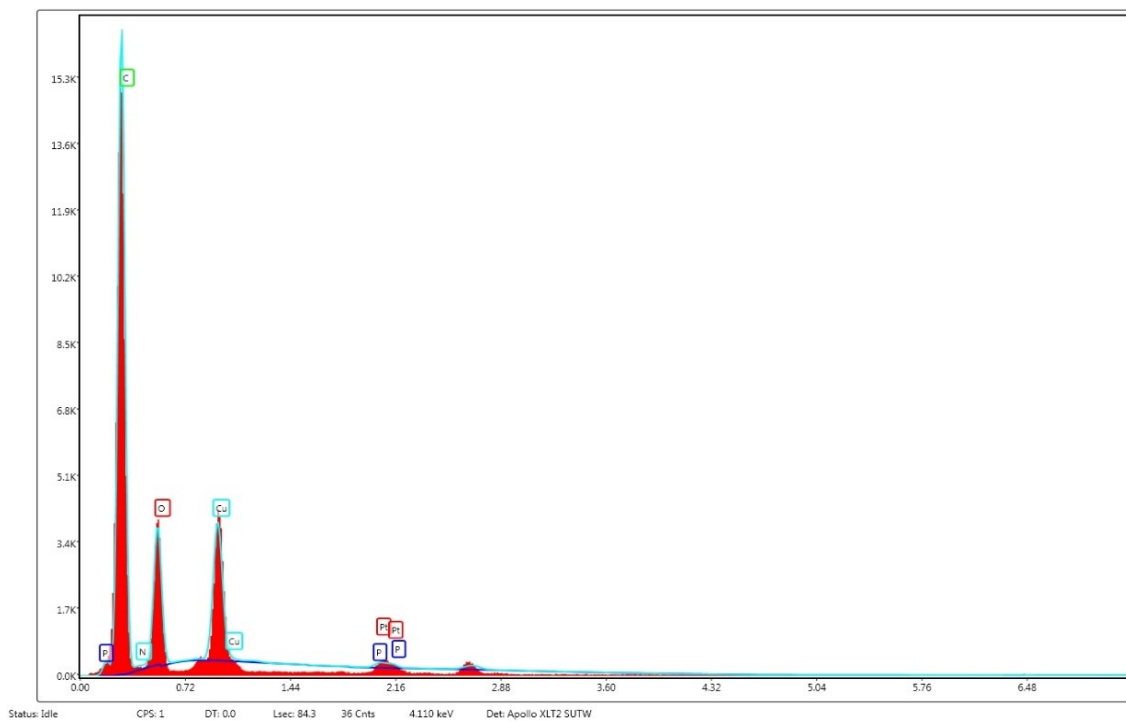

**Figure S3:** EDAX analysis pattern of the Pt@DNA (0.06 M) organosol at HR-TEM mode.

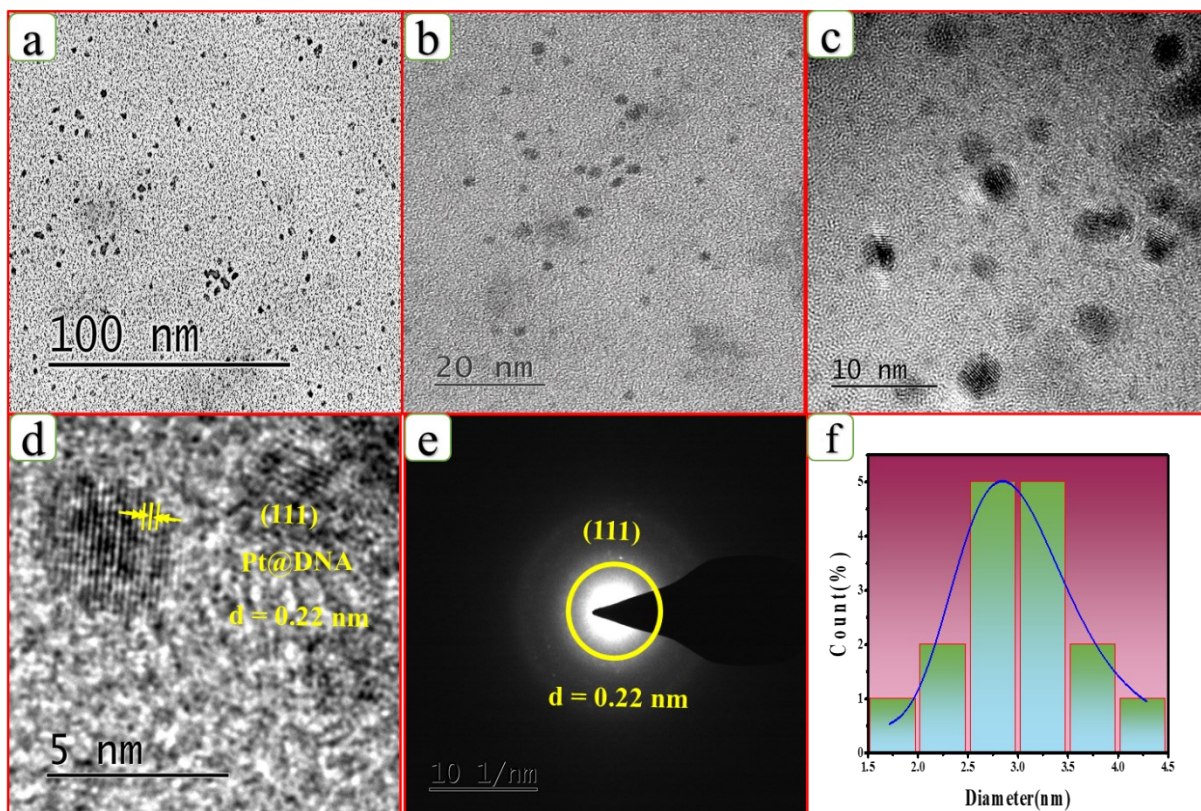

**Figure S4:** (a-d) shows the low and high magnified HR-TEM images of Pt@DNA (0.05 M) organosol; (e and f) represents corresponding SAED pattern and particle size distribution histogram of the same.

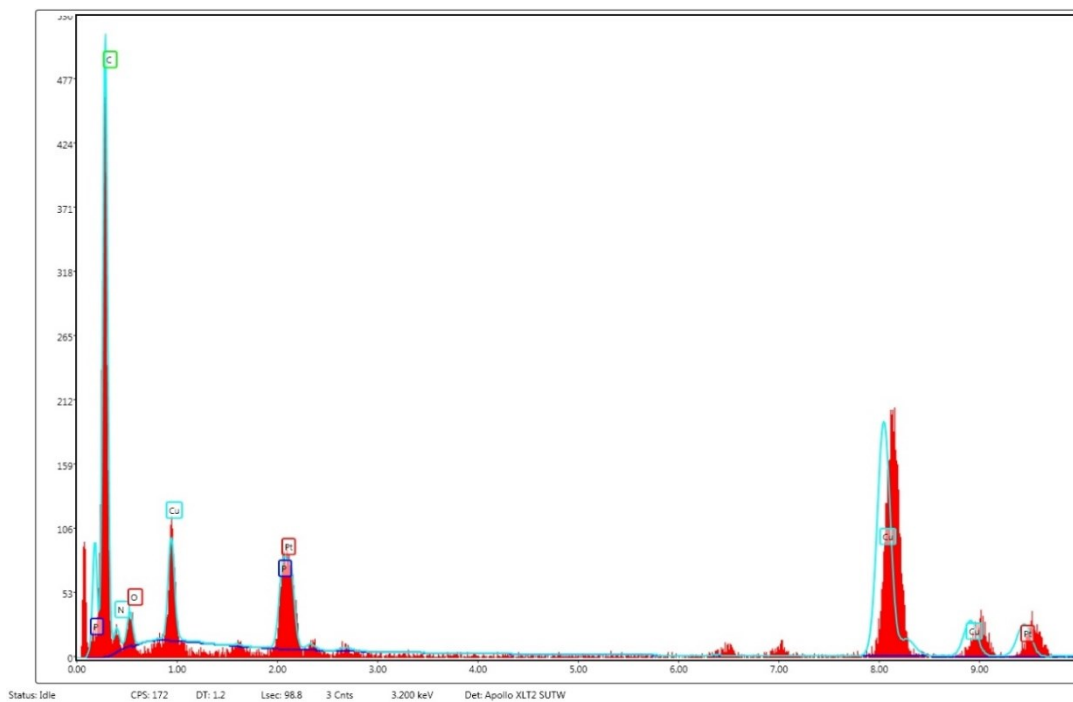

**Figure S5.** EDAX analysis pattern of the Pt@DNA (0.05 M) organosol at HR-TEM mode.

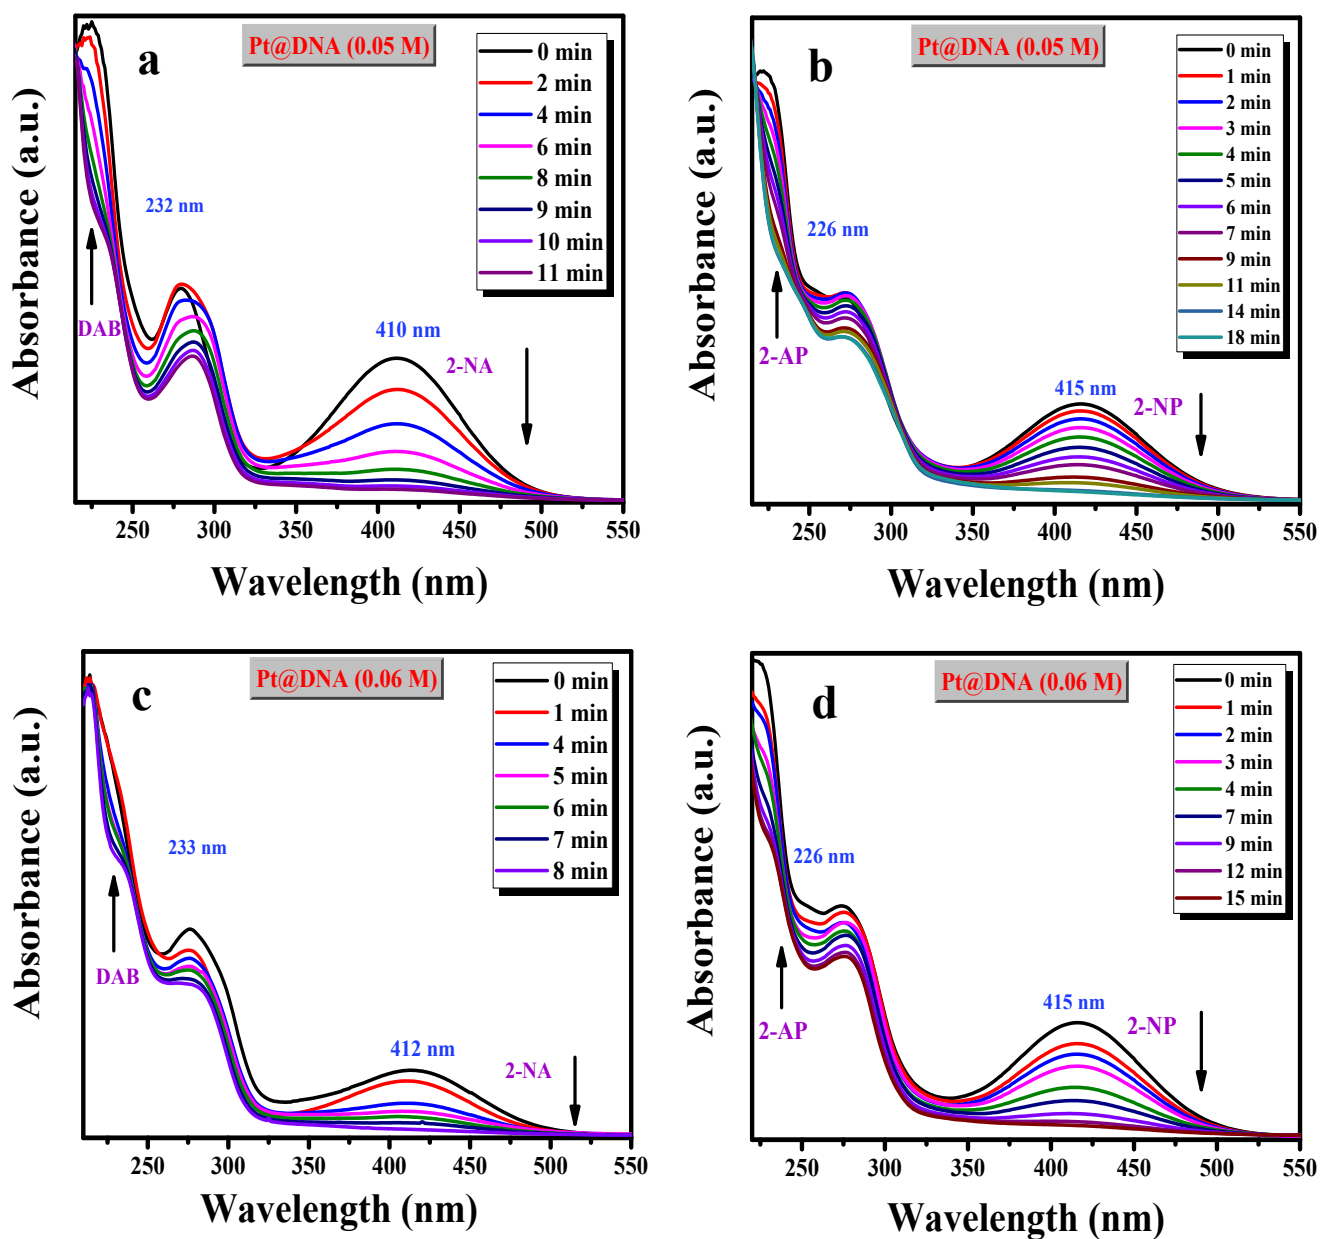

**Figure S6:** Time dependent UV-Vis absorption spectrum of catalytic reduction of nitro compounds into amine compounds, (a and b) shows the catalytic reduction of 2-NA using Pt@DNA (0.05 M) and Pt@DNA (0.06 M), (c and d) represents the catalytic reduction of 2-NP using Pt@DNA (0.05 M) and Pt@DNA (0.06 M).

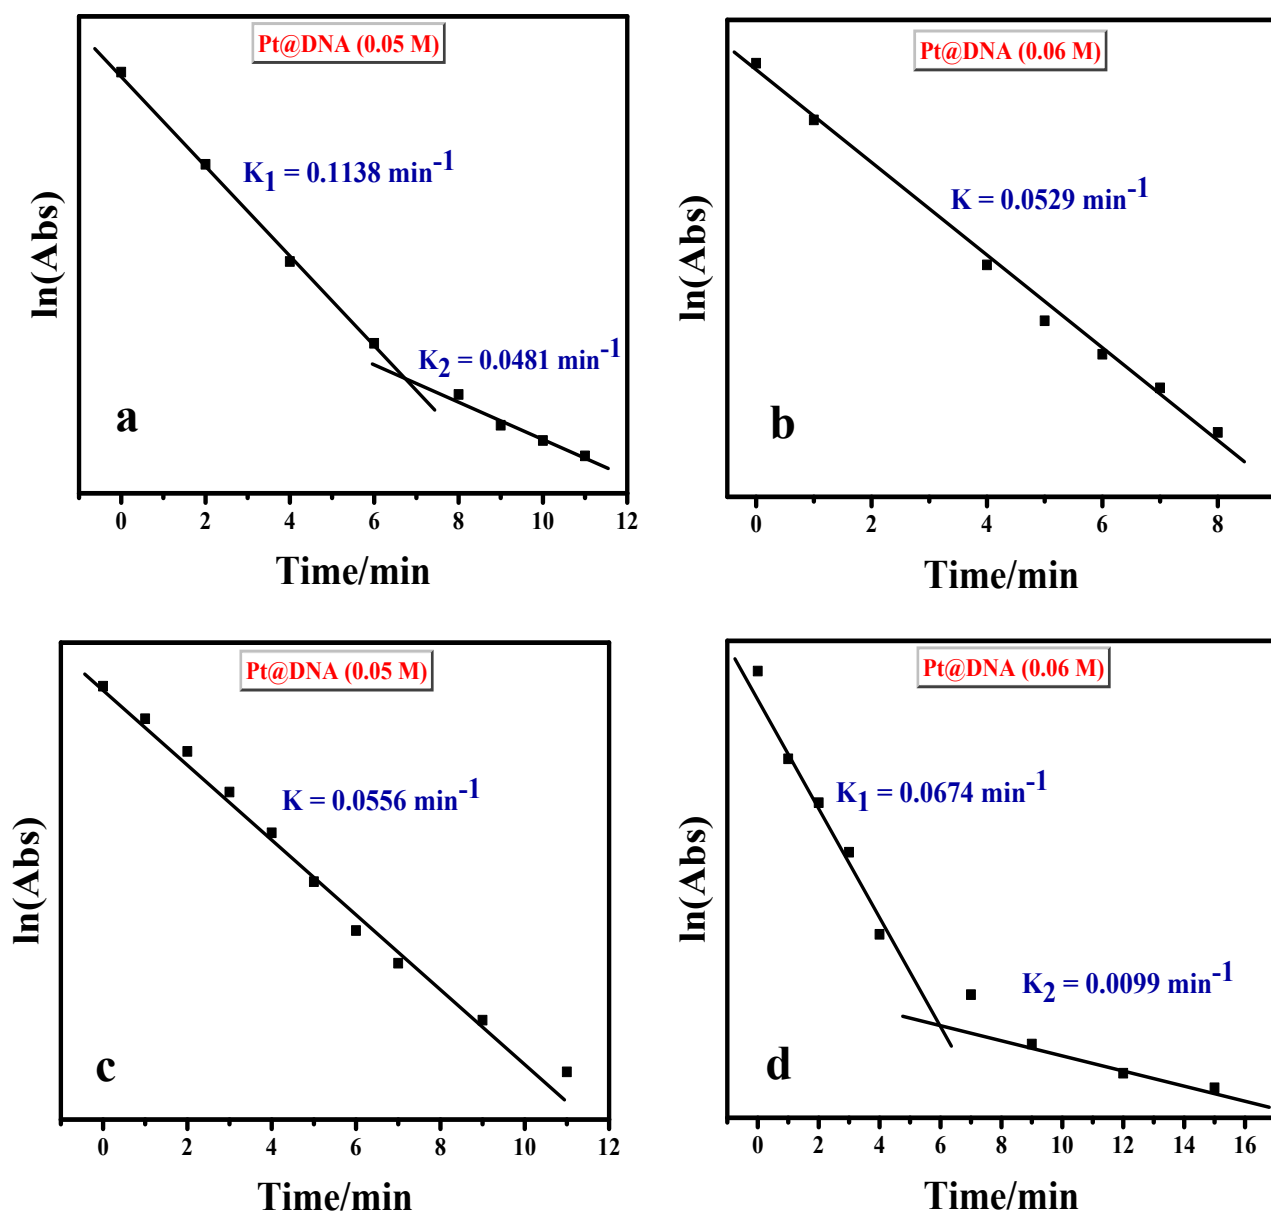

**Figure S7:** (a and b) are the ln (Abs) vs. Time (min) plot for reduction of 4-NP, (c and d) are the ln (Abs) vs. Time (min) for reduction of 4-NB.



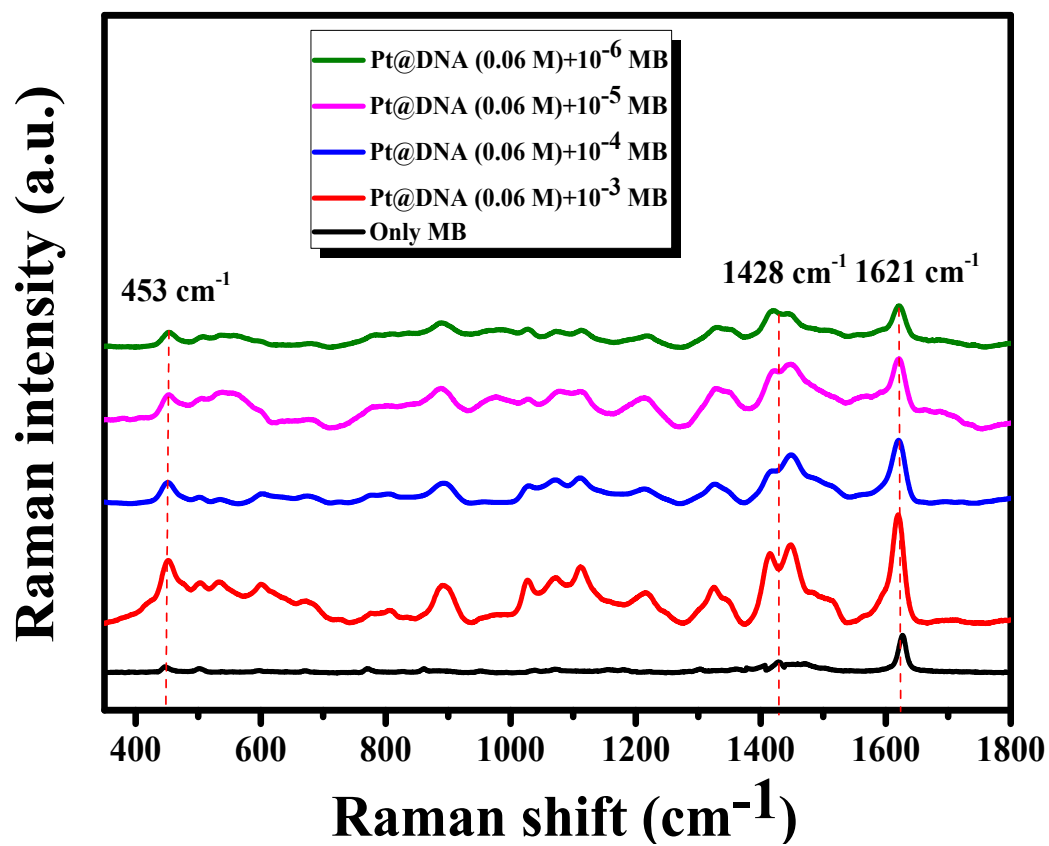

**Figure S8:** Shows the SERS spectra of MB probe molecule with Pt@DNA (0.06 M) organosol.

**Table S1.** Concentration of nitro compounds and NaBH<sub>4</sub> used for reduction in presence of Pt@DNA organosol as catalyst.

| <b>S. No</b> | <b>Initial conc. of Pt<sup>4+</sup> ions (M)</b> | <b>Volume of metal solution (mL)</b> | <b>Volume of DNA solution (mL)</b> | <b>Volume of EtOH (mL)</b> | <b>Amount of NaBH<sub>4</sub> (mg)</b> | <b>Observation</b> |
|--------------|--------------------------------------------------|--------------------------------------|------------------------------------|----------------------------|----------------------------------------|--------------------|
| 1            | 0.01                                             | 1                                    | 1                                  | 10                         | 10                                     | Not stable         |
| 2            | 0.01                                             | 1                                    | 2                                  | 9                          | 10                                     | Not stable         |
| 3            | 0.01                                             | 1                                    | 3                                  | 8                          | 10                                     | Not stable         |
| 4            | 0.01                                             | 1                                    | 4                                  | 7                          | 10                                     | Not stable         |
| 5            | 0.01                                             | 1                                    | 5                                  | 6                          | 10                                     | More Stable        |
| 6            | 0.01                                             | 1                                    | 6                                  | 5                          | 10                                     | More Stable        |
| 7            | 0.01                                             | 1                                    | 7                                  | 4                          | 10                                     | Not stable         |
| 8            | 0.01                                             | 1                                    | 8                                  | 3                          | 10                                     | Not stable         |

**Table S2.** Concentration of nitro compounds and NaBH<sub>4</sub> used for nitro compound reduction in presence of Pt@DNA organosol as catalyst.

| <b>S. No</b> | <b>Nitro compounds</b>     | <b>Volume of Nitro compounds (μL)</b> | <b>Volume of Water (mL)</b> | <b>Volume of 0.1 M NaBH<sub>4</sub> solution (μL)</b> | <b>Volume of Pt@DNA organosol catalyst (μL)</b> |
|--------------|----------------------------|---------------------------------------|-----------------------------|-------------------------------------------------------|-------------------------------------------------|
| 1            | 4-Nitrophenol (4-NP)       | 50                                    | 5                           | 100                                                   | 100                                             |
| 2            | 2-Nitrophenol (2-NP)       | 75                                    | 5                           | 100                                                   | 100                                             |
| 3            | 4-Nitrobenzaldehyde (4-NB) | 75                                    | 5                           | 100                                                   | 100                                             |
| 4            | 2-Nitroaniline (2-NA)      | 75                                    | 5                           | 100                                                   | 100                                             |

**Table S3.** Observed Selectivity, yield, TON, TOF and corresponding rate constants for the reduction of nitro compounds namely 4-NP, 4-NB, 2-NA and 2-NP by using Pt@DNA organosol as catalysts with concentrations of 0.05 M and 0.06 M.

| Sl. No. | Reactant | Catalyst        | Time (min) | Selectivity (%) | Yield (%) | TON $\times 10^2$ | TOF $\times 10^2$ (h <sup>-1</sup> ) | 1 <sup>st</sup> order rate constant (k) $\times 10^{-2}$ |
|---------|----------|-----------------|------------|-----------------|-----------|-------------------|--------------------------------------|----------------------------------------------------------|
| 1       | 4-NP     | Pt@DNA (0.05 M) | 38         | 100             | 92        | 131.42            | 207.61                               | 6.86                                                     |
|         |          | Pt@DNA (0.06 M) | 29         | 100             | 96        | 115.66            | 239.31                               | <b>8.43</b>                                              |
| 2       | 4-NB     | Pt@DNA (0.05 M) | 20         | 100             | 90        | 128.57            | 386.09                               | 6.87                                                     |
|         |          | Pt@DNA (0.06 M) | 10         | 100             | 93        | 112.04            | 672.51                               | 7.45                                                     |
| 3       | 2-NA     | Pt@DNA (0.05 M) | 11         | 100             | 80        | 114.28            | 624.48                               | 8.09                                                     |
|         |          | Pt@DNA (0.06 M) | 8          | 100             | 88        | 106.02            | 795.34                               | 5.29                                                     |
| 4       | 2-NP     | Pt@DNA (0.05 M) | 18         | 100             | 80        | 114.28            | 380.93                               | 5.56                                                     |
|         |          | Pt@DNA (0.06 M) | 15         | 100             | 85        | 102.40            | 409.60                               | 3.86                                                     |

**Table S4.** Comparison table for catalytic reduction capability of Pt@-DNA organosol with other reported compounds. \*(all given ref. are available in main manuscript)

| <b>Materials</b>                     | <b>Self-assembled methods</b> | <b>Reactant</b>                    | <b>Rate constant (min<sup>-1</sup>)</b>                                                                                         | <b>Ref.*</b> |
|--------------------------------------|-------------------------------|------------------------------------|---------------------------------------------------------------------------------------------------------------------------------|--------------|
| Re NPs                               | PAH-scaffold                  | 4-NP                               | $1.52 \times 10^{-1}$                                                                                                           | 1            |
| DNA-Ag nanowire                      | DNA-assembly                  | 4-NP                               | $2.82 \times 10^{-2}$                                                                                                           | 2            |
| Au NPs                               | Trisodium citrate             | 4-NP                               | $0.976 \times 10^{-2}$                                                                                                          | 3            |
| Au@DNA                               | DNA assisted                  | 4-NA                               | $9.09 \times 10^{-2}$                                                                                                           | 4            |
| Au, Ag, Pd decorated silica nanotube | di-peptide assisted           | 4-NP                               | $7.3 \times 10^{-3}$                                                                                                            | 5            |
| Pt NPs in aqueous medium             | DNA-assisted                  | 4-NP                               | $7.4 \times 10^{-2}$                                                                                                            | 6            |
| Rh-DNA organosol                     | DNA- assisted                 | 4-NP                               | $4.32 \times 10^{-2}$                                                                                                           | 7            |
| Pt@DNA                               | DNA-assisted                  | 4-NP,<br>2-NP,<br>4-NB and<br>4-NA | $8.43 \times 10^{-2}$ (4-NP),<br>$3.86 \times 10^{-2}$ (2-NP),<br>$7.45 \times 10^{-2}$ (4-NB),<br>$5.29 \times 10^{-2}$ (4-NA) | This work    |

**Table S5.** Enhancement factors (EF) obtained with different molar ratios of methylene blue (MB) like  $10^{-3}$ ,  $10^{-4}$ ,  $10^{-5}$  and  $10^{-6}$  M Pt@DNA (0.05 M) organosol.

| Sl. No | Concentration of probe molecule MB (M) | Catalyst        | EF Value                    |                             |                            |
|--------|----------------------------------------|-----------------|-----------------------------|-----------------------------|----------------------------|
|        |                                        |                 | Peak @1626 $\text{cm}^{-1}$ | Peak @1395 $\text{cm}^{-1}$ | Peak @447 $\text{cm}^{-1}$ |
| 1      | $10^{-3}$                              | Pt@DNA (0.05 M) | $9.626 \times 10^2$         | $1.458 \times 10^3$         | $2.180 \times 10^3$        |
| 2      | $10^{-4}$                              | Pt@DNA (0.05 M) | $5.100 \times 10^3$         | $6.083 \times 10^3$         | $9.752 \times 10^3$        |
| 3      | $10^{-5}$                              | Pt@DNA (0.05 M) | $3.498 \times 10^4$         | $4.861 \times 10^4$         | $6.934 \times 10^4$        |
| 4      | $10^{-6}$                              | Pt@DNA (0.05 M) | $2.917 \times 10^5$         | $4.250 \times 10^5$         | $4.941 \times 10^5$        |

**Table S6.** Enhancement factors (EF) obtained with different molar ratios of MB like  $10^{-3}$ ,  $10^{-4}$ ,  $10^{-5}$  and  $10^{-6}$  M Pt@DNA (0.06 M) organosol.

| Sl. No | Concentration of probe molecule MB (M) | Catalyst        | EF Value                    |                             |                            |
|--------|----------------------------------------|-----------------|-----------------------------|-----------------------------|----------------------------|
|        |                                        |                 | Peak @1621 $\text{cm}^{-1}$ | Peak @1428 $\text{cm}^{-1}$ | Peak @453 $\text{cm}^{-1}$ |
| 1      | $10^{-3}$                              | Pt@DNA (0.06 M) | $4.679 \times 10^2$         | $9.294 \times 10^2$         | $7.686 \times 10^2$        |
| 2      | $10^{-4}$                              | Pt@DNA (0.06 M) | $2.789 \times 10^3$         | $6.313 \times 10^3$         | $5.877 \times 10^3$        |
| 3      | $10^{-5}$                              | Pt@DNA (0.06 M) | $2.376 \times 10^4$         | $5.470 \times 10^4$         | $5.683 \times 10^4$        |
| 4      | $10^{-6}$                              | Pt@DNA (0.06 M) | $1.549 \times 10^5$         | $4 \times 10^5$             | $4.230 \times 10^5$        |

**Table S7.** Comparison table for SERS enhancement factor with other materials in organic and aq. medium. \*(all given ref. are given below)

| <b>Sl. No.</b> | <b>Metal NPs</b> | <b>Medium</b>    | <b>SERS probe molecules</b> | <b>Enhancement Factor (EF)</b> | <b>Ref.*</b> |
|----------------|------------------|------------------|-----------------------------|--------------------------------|--------------|
| 1              | Ag–Pt            | H <sub>2</sub> O | R6G                         | $9.1 \times 10^6$              | 8            |
| 2              | Au@Pt            | H <sub>2</sub> O | 4-NTP                       | $1.2 \times 10^6$              | 9            |
| 3              | Os organosol     | Acetone          | MB                          | $1.62 \times 10^5$             | 10           |
| 4              | Ir@DNA organosol | Ethanol          | MB                          | $8 \times 10^5$                | 11           |
| 5              | Pt-DNA           | H <sub>2</sub> O | MB                          | $2.52 \times 10^5$             | 6            |
| 6              | Rh-DNA Organosol | EtOH             | MB                          | $2.89 \times 10^6$             | 7            |
| 7              | Pt@DNA Organosol | EtOH             | MB                          | $4.94 \times 10^5$             | This Work    |



## References

- 1 S. Anantharaj, K. Sakthikumar, A. Elangovan, G. Ravi, T. Karthik and S. Kundu, *J. Colloid Interface Sci.*, 2016, **483**, 360–373.
- 2 D. Majumdar, A. Singha, P. K. Mondal and S. Kundu, *ACS Appl. Mater. Interfaces*, 2013, **5**, 7798–7807.
- 3 S. Panigrahi, S. Basu, S. Praharaj, S. Pande, S. Jana, A. Pal, S. K. Ghosh and T. Pal, *J. Phys. Chem. C*, 2007, **111**, 4596–4605.
- 4 *Langmuir*, 2018, **34**, 4122.
- 5 Y. Lin, Y. Qiao, Y. Wang, Y. Yan and J. Huang, *J. Mater. Chem.*, 2012, **22**, 18314–18320.
- 6 S. S. Sankar, K. Sangeetha, K. Karthick, S. Anantharaj, S. R. Ede and S. Kundu, *New J. Chem.*, 2018, **42**, 15784–15792.
- 7 A. Karmakar, K. Karthick, S. S. Sankar, S. Kumaravel and S. Kundu, *Appl. Surf. Sci.*, 2020, **527**, 146777.
- 8 T. Wang, J. Zhou and Y. Wang, *Nanomaterials*, , DOI:10.3390/nano8050331.
- 9 Q. Cui, G. Shen, X. Yan, L. Li, H. Möhwald and M. Bargheer, *ACS Appl. Mater. Interfaces*, 2014, **6**, 17075–17081.
- 10 S. Anantharaj, U. Nithiyantham, S. R. Ede and S. Kundu, *Ind. Eng. Chem. Res.*, 2014, **53**, 19228–19238.
- 11 K. Sakthikumar, S. Anantharaj, S. R. Ede, K. Karthick, G. Ravi, T. Karthik and S. Kundu, *J. Mater. Chem. C*, 2017, **5**, 11947–11957.
